# Supplementary material for: Photoinduced reaction mechanisms in prototypical and bathy phytochromes
Source: Royal Society of Chemistry journal article supplement (doi:10.1039/d2cp00020b), 2022-01-01
Supplement: d2cp00020b1.pdf [file d2cp00020b1.pdf]

## Supporting Information

### Photoinduced Reaction Mechanisms in Prototypical and Bathy Phytochromes

María Fernández López,<sup>1</sup> Margarethe Dahl,<sup>1</sup> Francisco Velázquez Escobar,<sup>1</sup> Hernán Ruy Bonomi,<sup>2</sup> Anastasia Kraskov,<sup>1</sup> Norbert Michael,<sup>1</sup> Maria Andrea Mroginski,<sup>1</sup> Patrick Scheerer,<sup>3</sup> and Peter Hildebrandt<sup>1</sup>

<sup>1</sup> Technische Universität Berlin, Institut für Chemie, Sekr. PC14, Straße des 17. Juni 135, D-10623 Berlin, Germany

<sup>2</sup> Leloir Institute Foundation, IIBBA-CONICET, Av. Patricias Argentinas 435 (C1405BWE), Buenos Aires, Argentina

<sup>3</sup> Charité – Universitätsmedizin Berlin, corporate member of Freie Universität Berlin and Humboldt-Universität zu Berlin, Institute of Medical Physics and Biophysics, Group Protein X-ray Crystallography and Signal Transduction, Charitéplatz 1, D-10117 Berlin, Germany

#### Content

Figures S1 – S9: RR spectra of various states of Agp1, XccBphP, and Agp2.

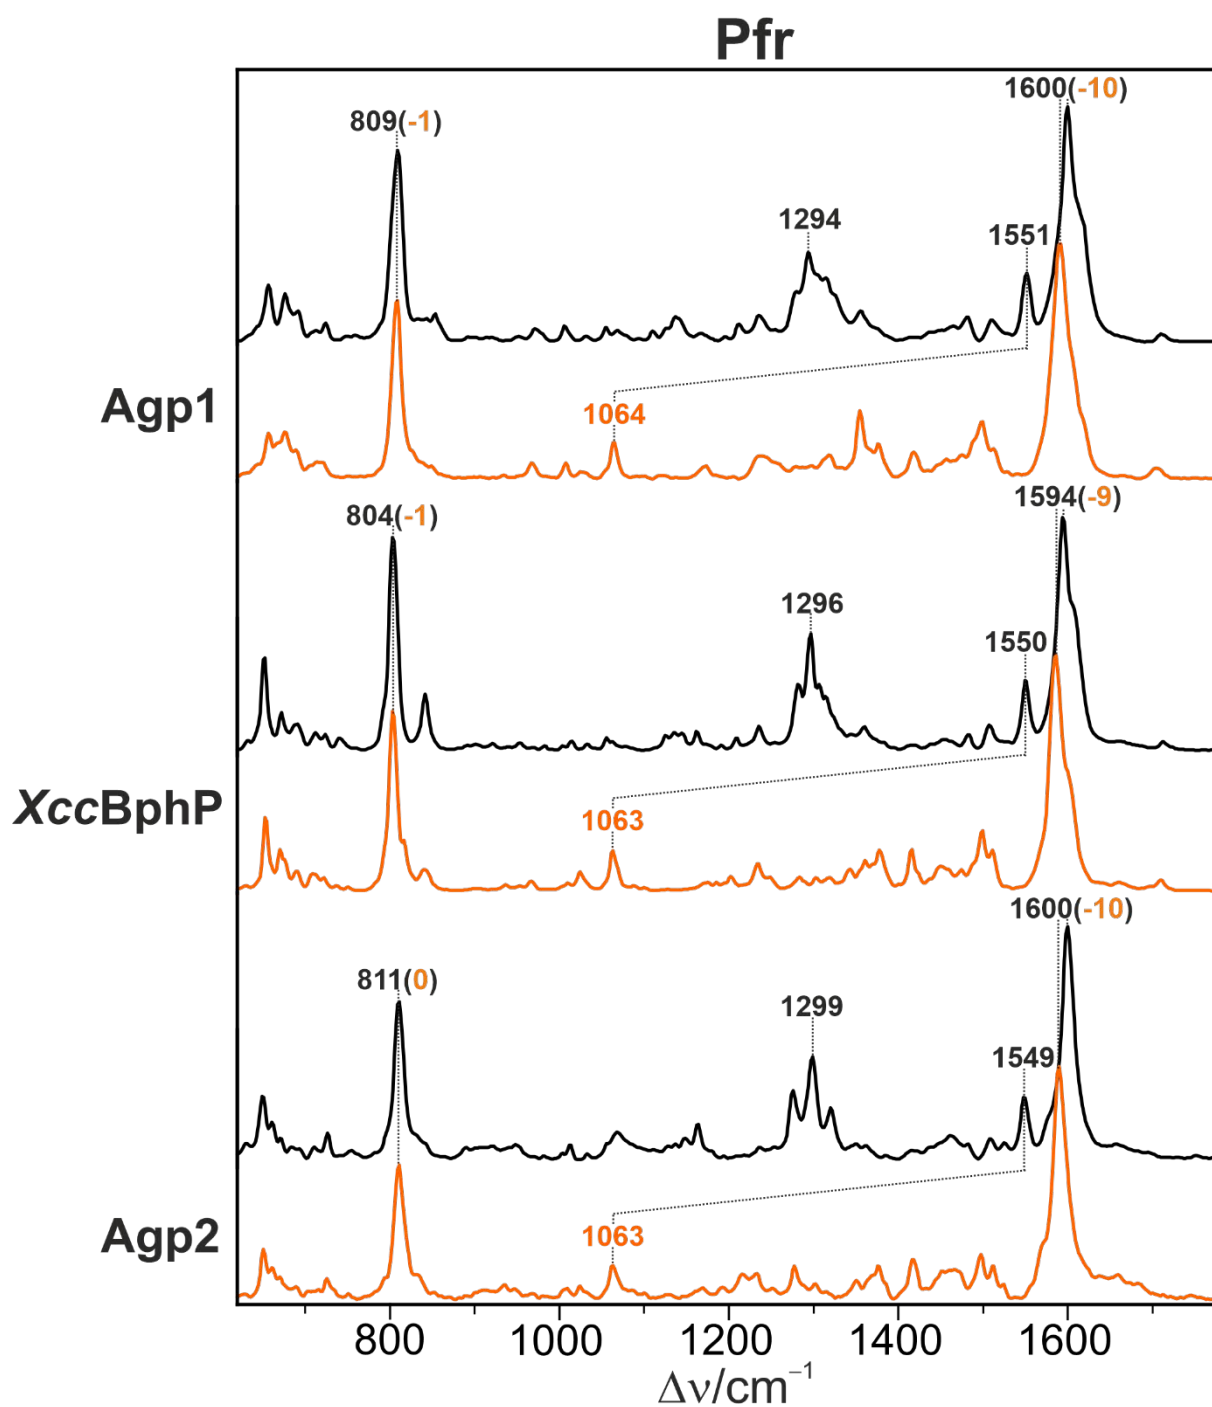

**Figure S1.** RR spectra of the Pfr state of Agp1, XccBphP, and Agp2 in H<sub>2</sub>O (black traces) and D<sub>2</sub>O (orange traces). Experimental details are given in the manuscript.

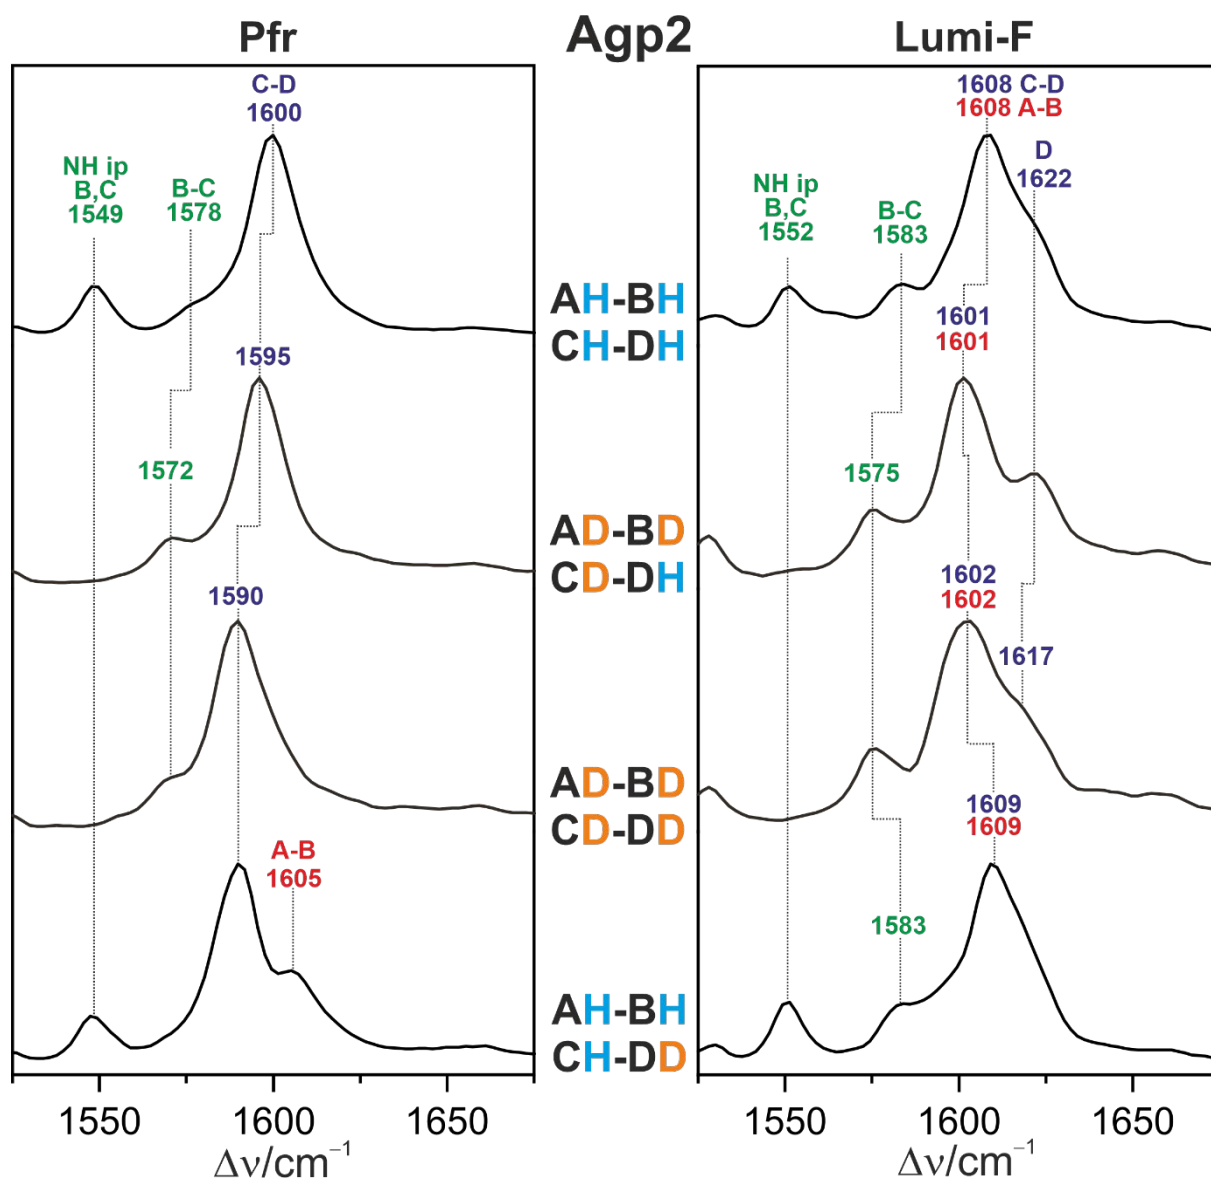

**Figure S2.** RR spectra of the Pfr and Lumi-F states of Agp2 at different H/D pattern of the four pyrrole rings *A*, *B*, *C*, and *D* as indicated schematically in the center of the figure. The procedure to achieve the selective H/D exchange was described previously.<sup>1</sup>

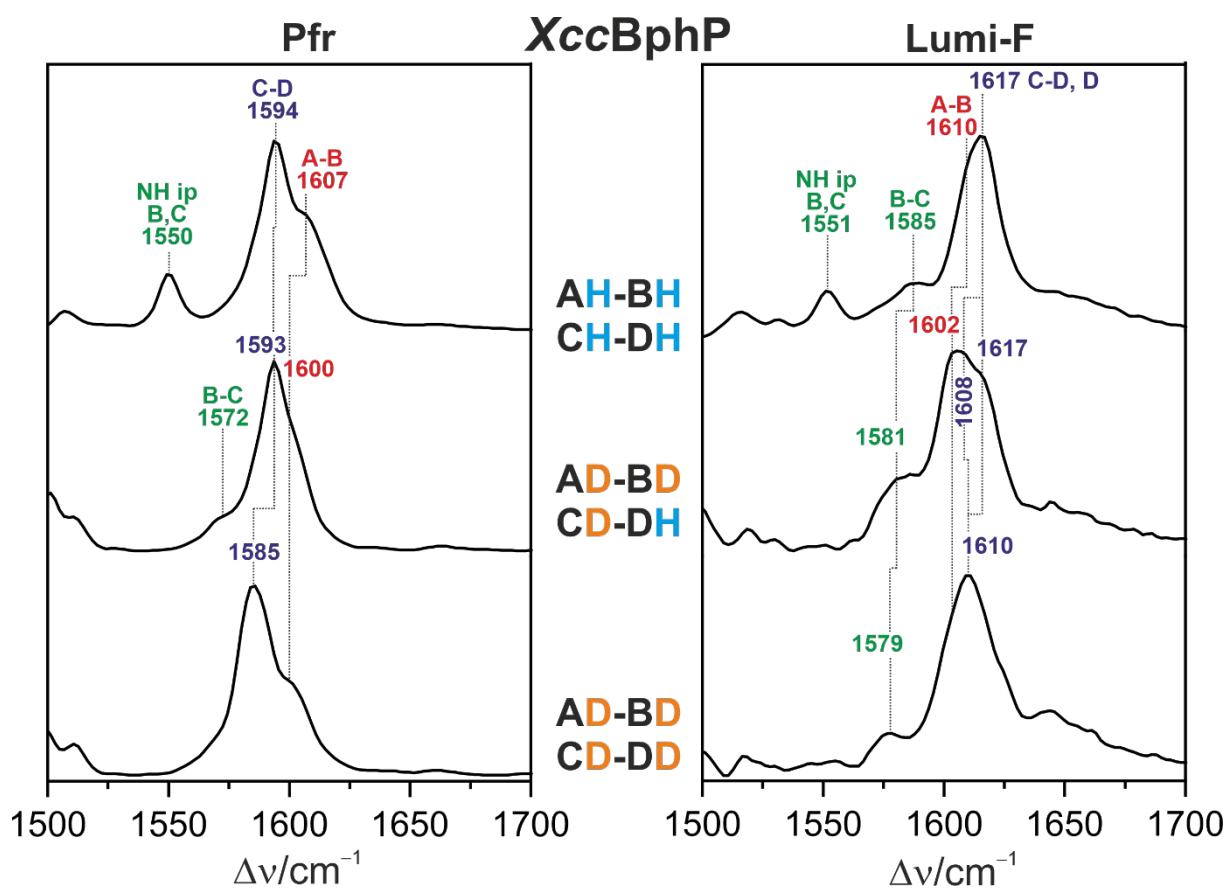

**Figure S3.** RR spectra of the Pfr and Lumi-F states of XccBphP at different H/D pattern of the four pyrrole rings *A*, *B*, *C*, and *D* as indicated schematically in the center of the figure. The procedure to achieve the selective H/D exchange was described previously.<sup>1</sup>

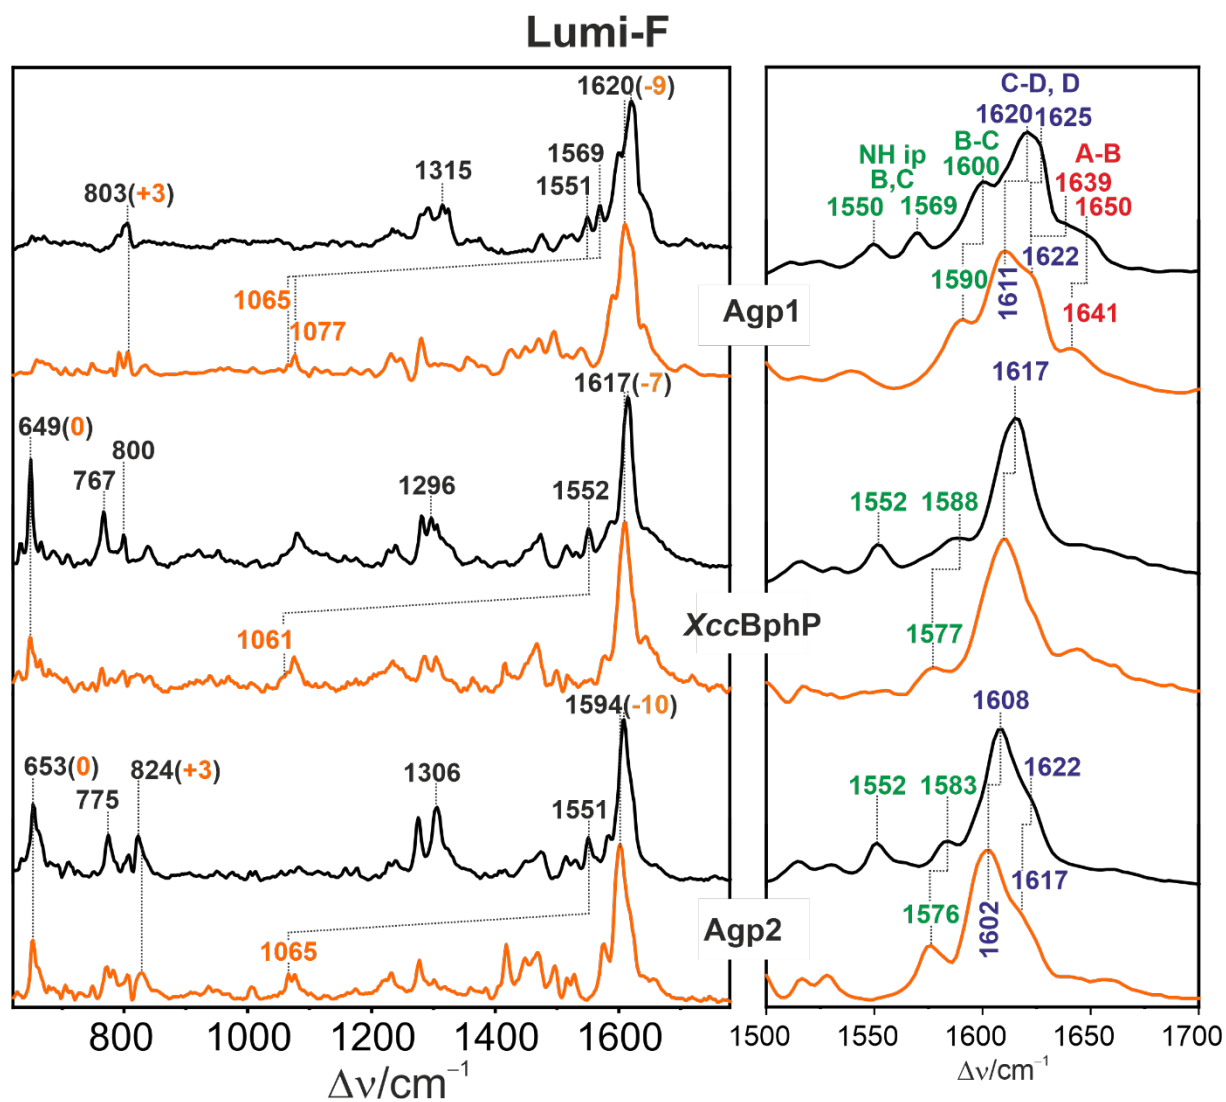

**Figure S4.** RR spectra of the Lumi-F state of Agp1, *XccBphP*, and Agp2 in H<sub>2</sub>O (black traces) and D<sub>2</sub>O (orange traces). Experimental details are given in the manuscript. The color code of the peak labels in the right panel refers to Figure 1 in the manuscript.

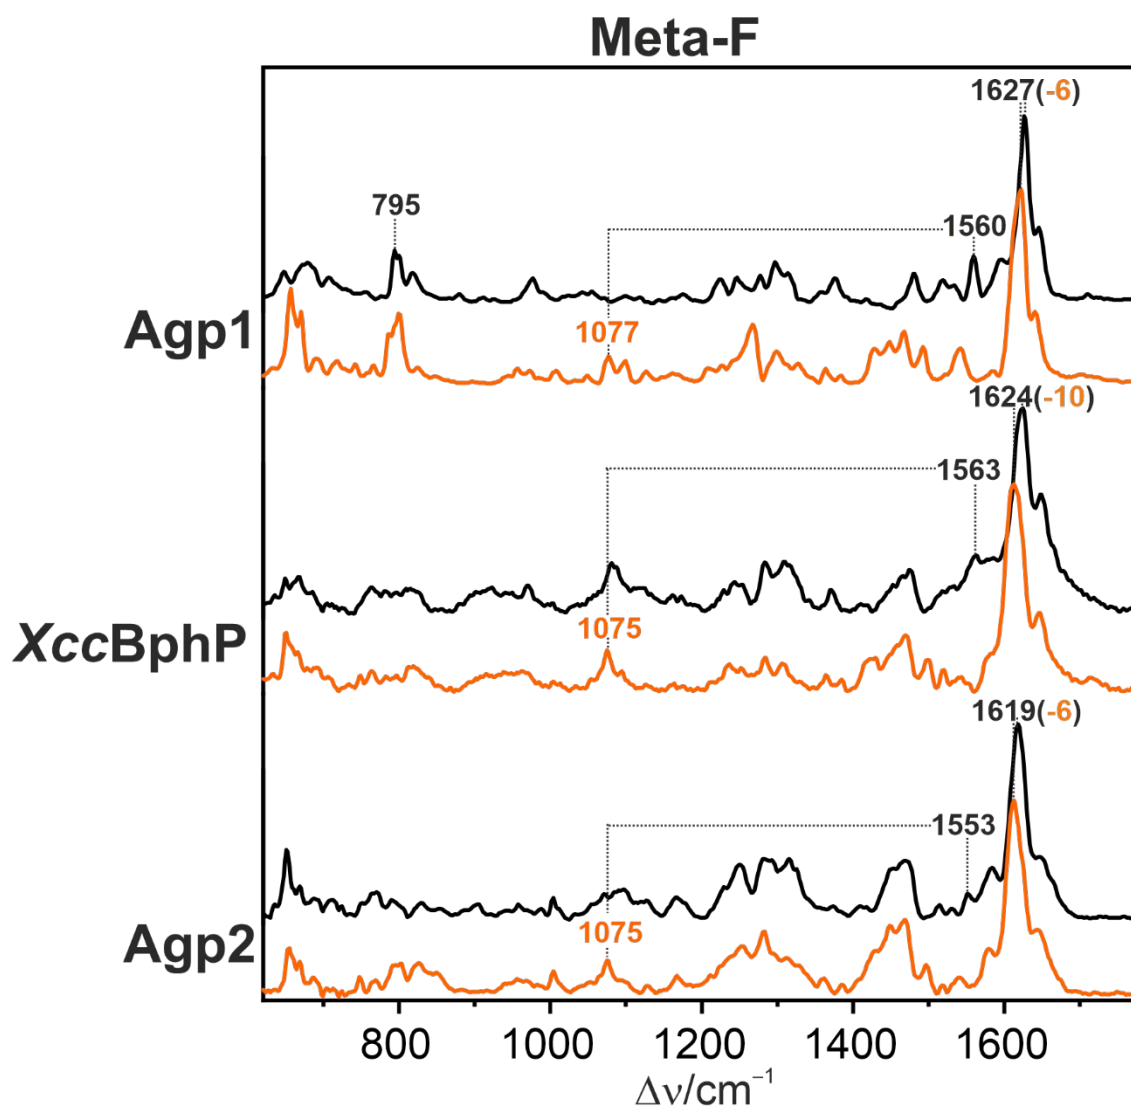

**Figure S5.** RR spectra of the Meta-F state of Agp1, XccBphP, and Agp2 in H<sub>2</sub>O (black traces) and D<sub>2</sub>O (orange traces). Experimental details are given in the manuscript.

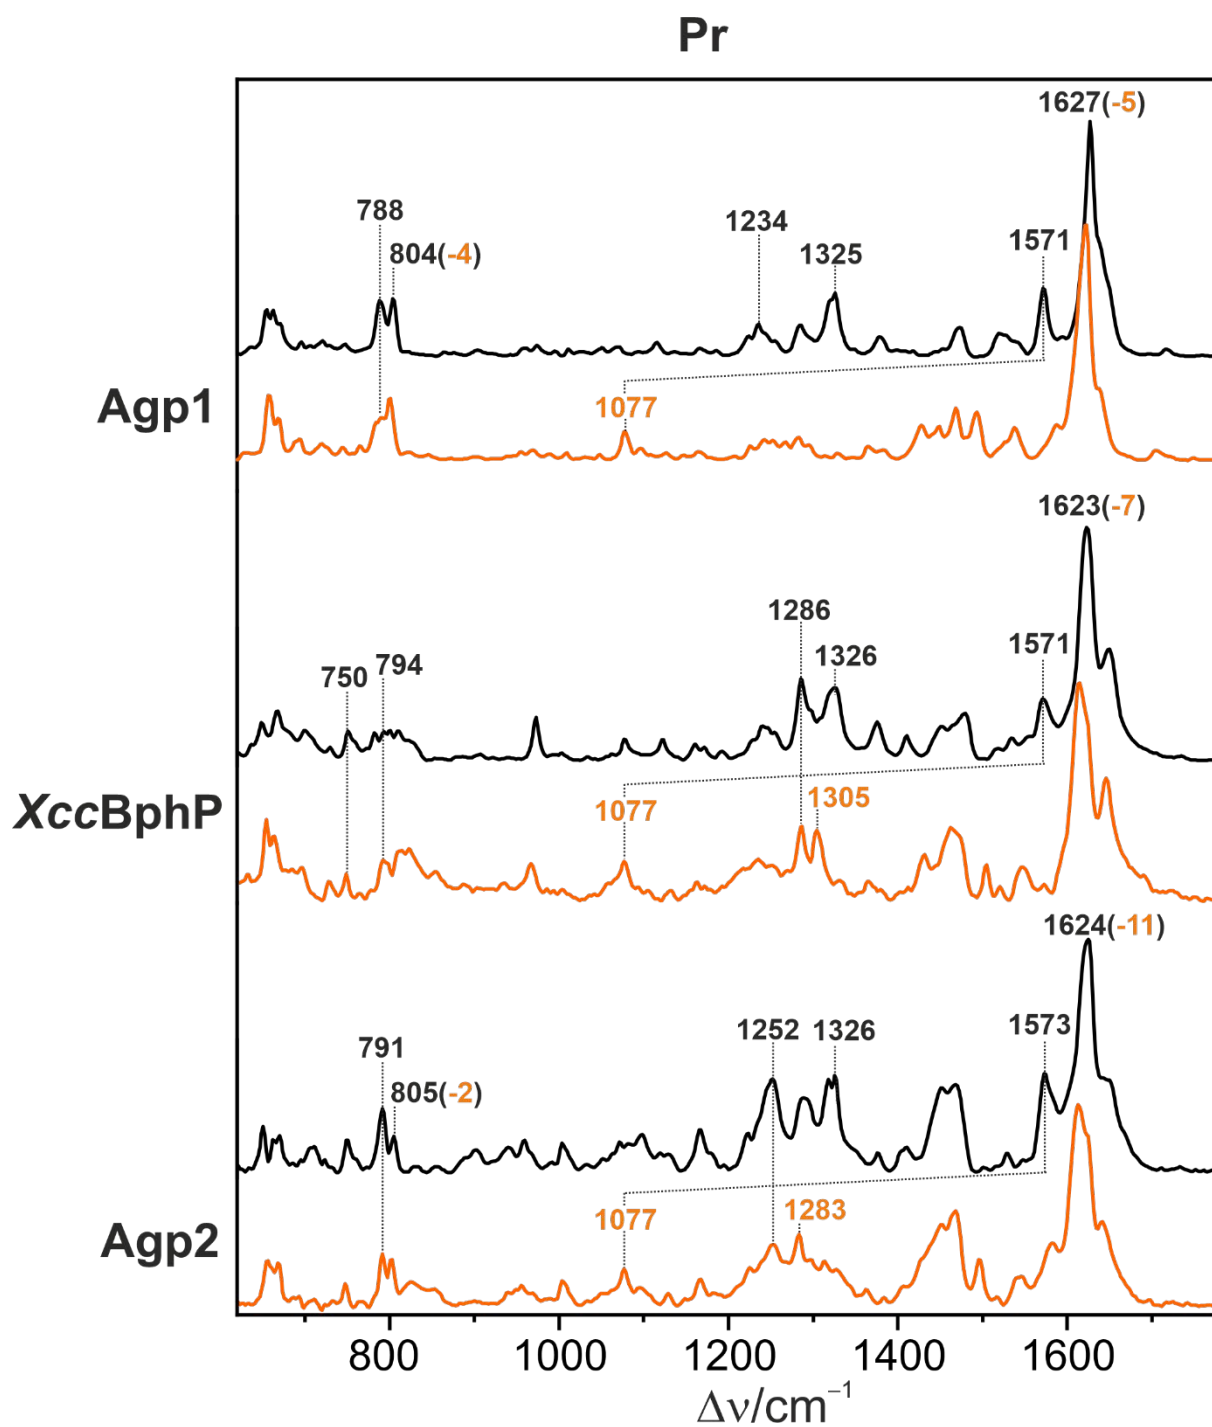

**Figure S6.** RR spectra of the Pr state of Agp1, *XccBphP*, and Agp2 in H<sub>2</sub>O (black traces) and D<sub>2</sub>O (orange traces). Experimental details are given in the manuscript.

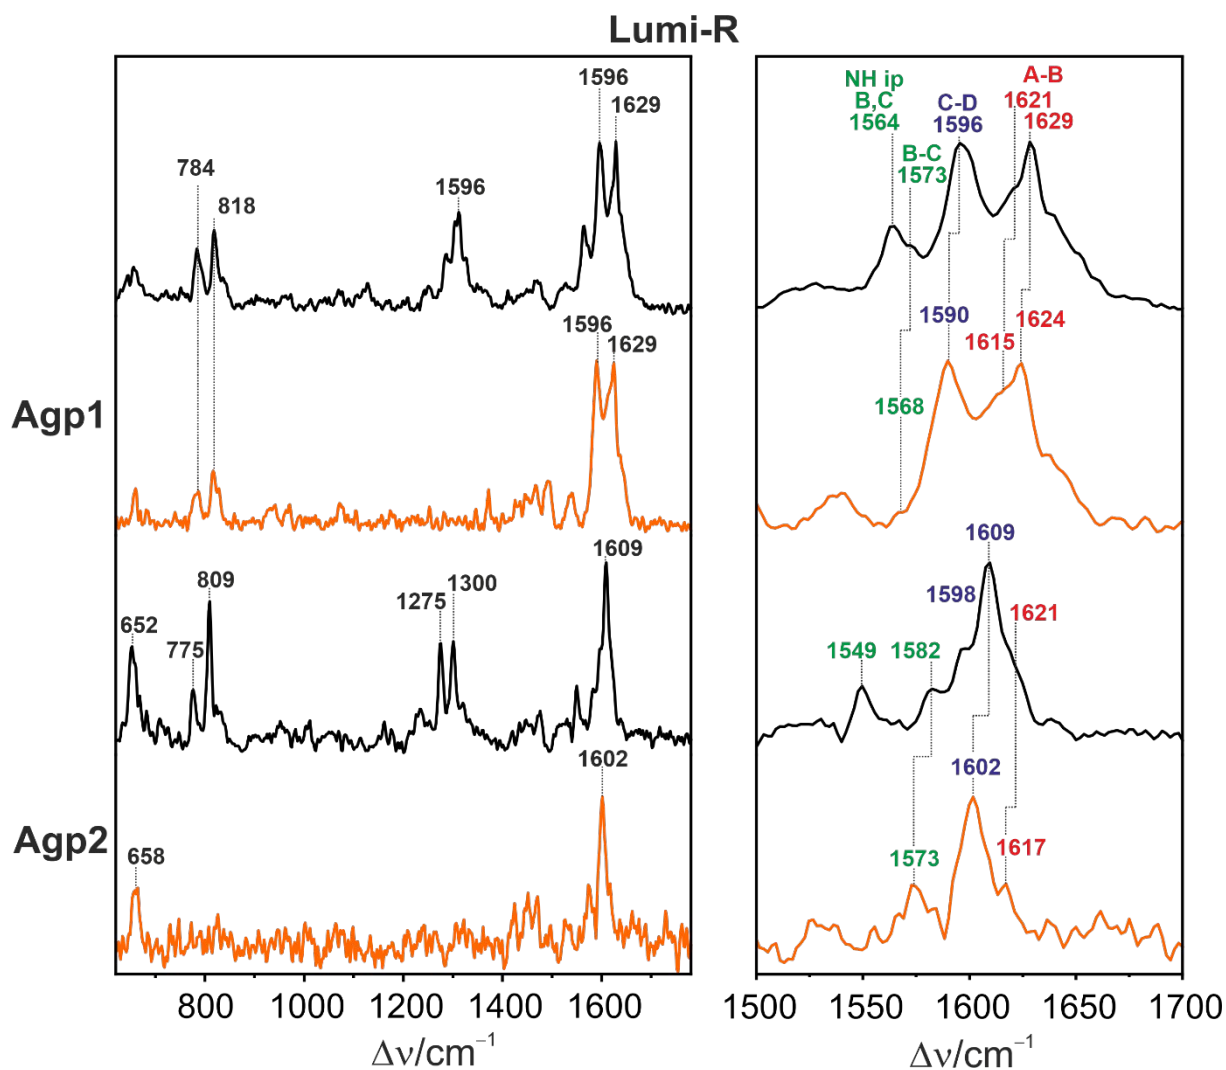

**Figure S7.** RR spectra of the Lumi-R state of Agp1 and Agp2 in H<sub>2</sub>O (black traces) and D<sub>2</sub>O (orange traces). Experimental details are given in the manuscript. The color code of the peak labels in the right panel refers to Figure 1 in the manuscript.



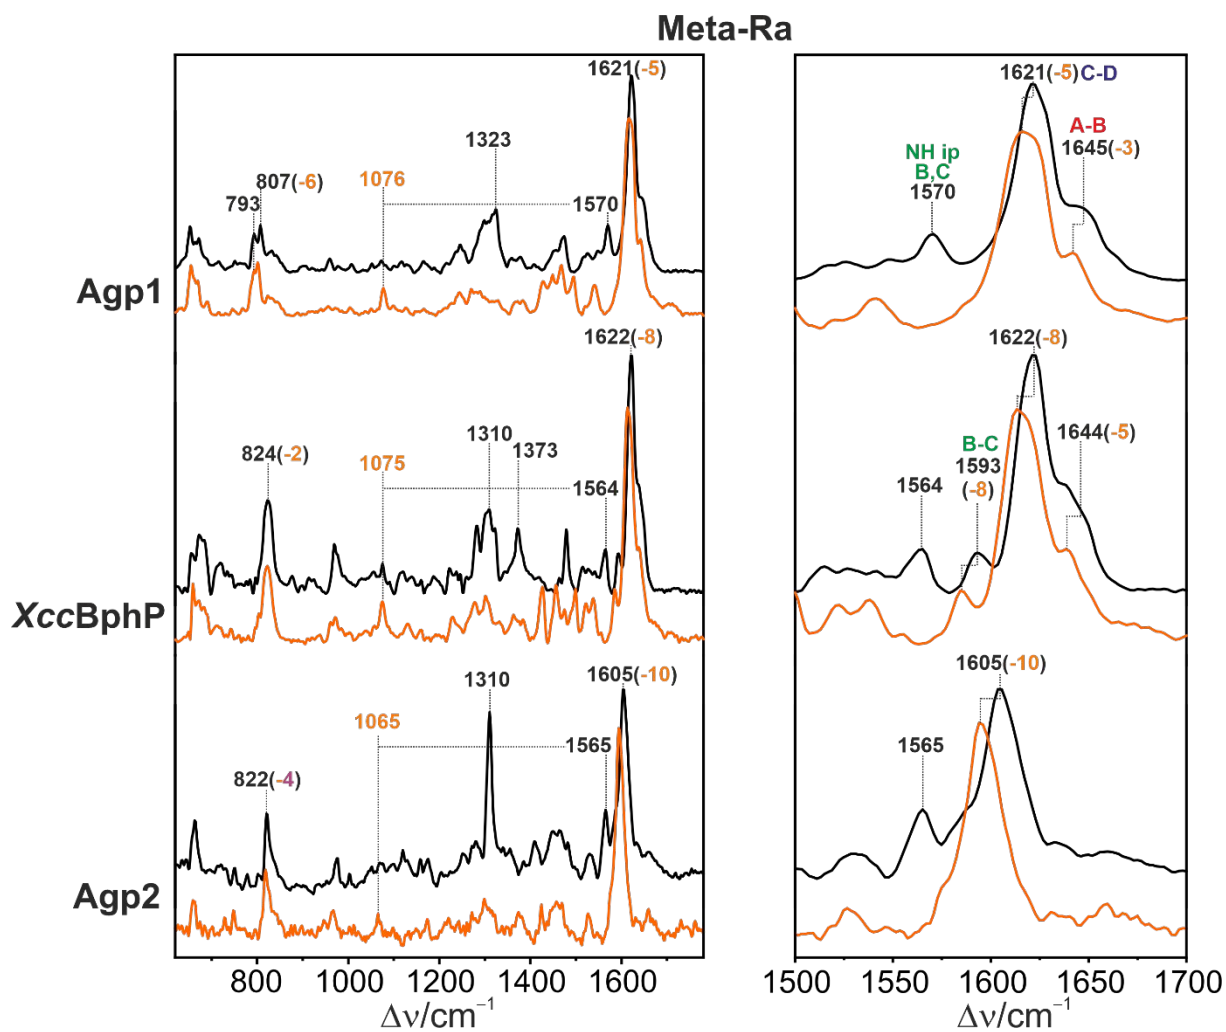

**Figure S8.** RR spectra of the Meta-Ra state of Agp1, XccBphP, and Agp2 in H<sub>2</sub>O (black traces) and D<sub>2</sub>O (orange traces). Experimental details are given in the manuscript. The color code of the peak labels in the right panel refers to Figure 1 in the manuscript.

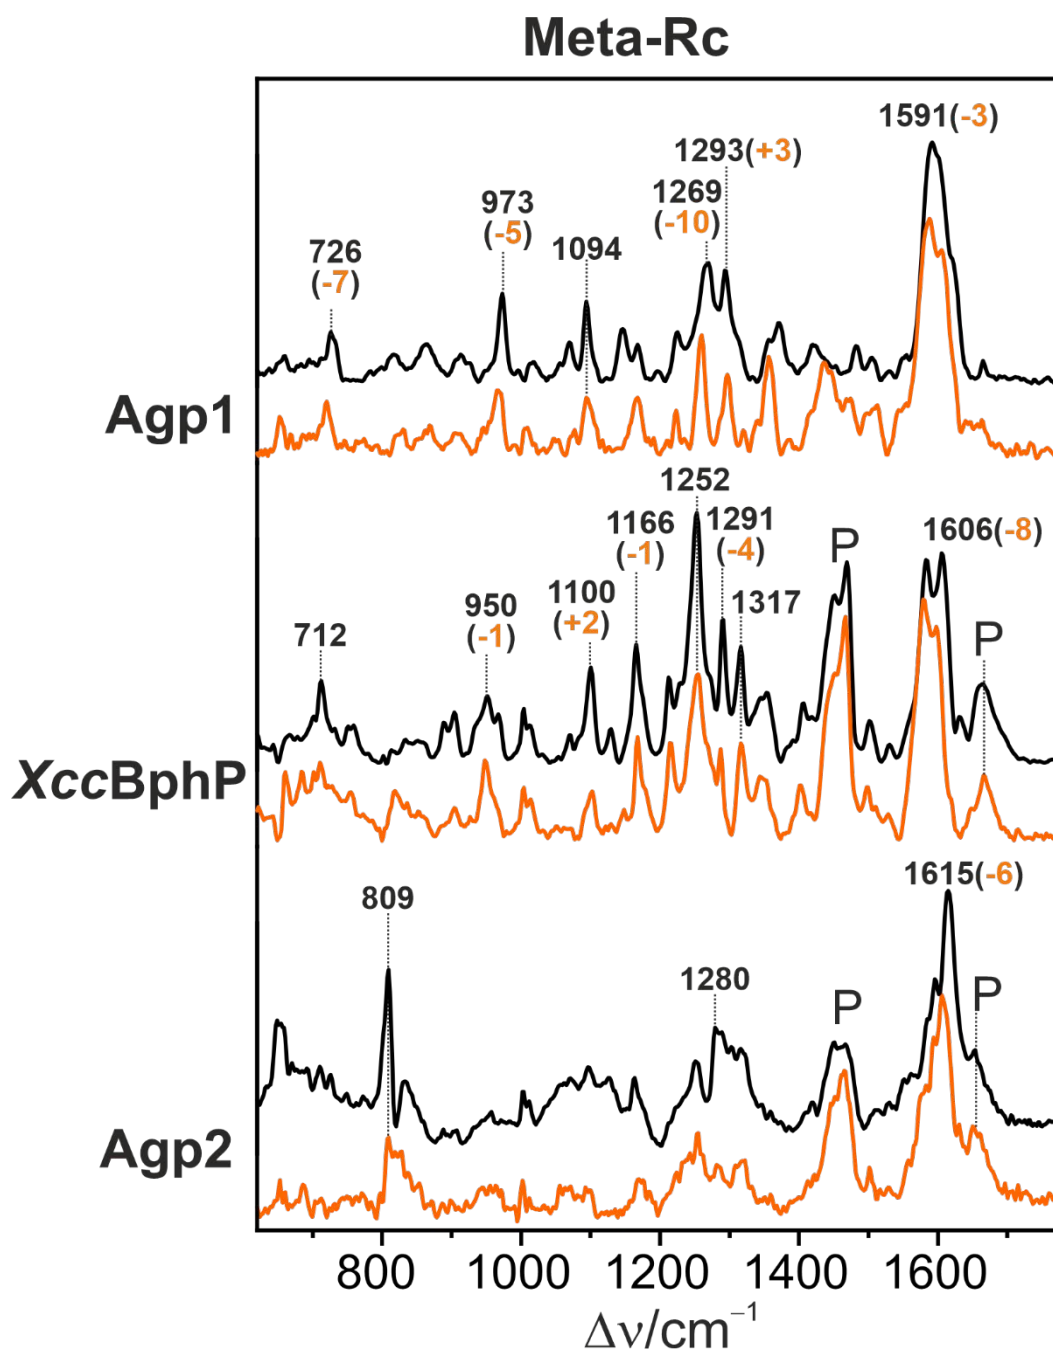

**Figure S9.** RR spectra of the Meta-Rc state of Agp1, XccBphP, and Agp2 in H<sub>2</sub>O (black traces) and D<sub>2</sub>O (orange traces). Experimental details are given in the manuscript. “P” denotes Raman bands of the protein.

## References

- 1 F. Velazquez Escobar, P. Piwowarski, J. Salewski, N. Michael, M. Fernandez Lopez, A. Rupp, M. B. Qureshi, P. Scheerer, F. Bartl, N. Frankenberg-Dinkel, F. Siebert, M. A. Mroginski and P. Hildebrandt, A protonation-coupled feedback mechanism controls the signalling process in bathy phytochromes, *Nat. Chem.*, 2015, **7**, 423–430.
